# Supplementary material for: Edge-modulated dual spin-filter effect in zigzag-shaped buckling Ag2S nanoribbons
Source: Royal Society of Chemistry journal article supplement (doi:10.1039/c9cp02521a), 2019-01-01
Supplement: c9cp02521a1.pdf [file c9cp02521a1.pdf]

### Supplementary Information

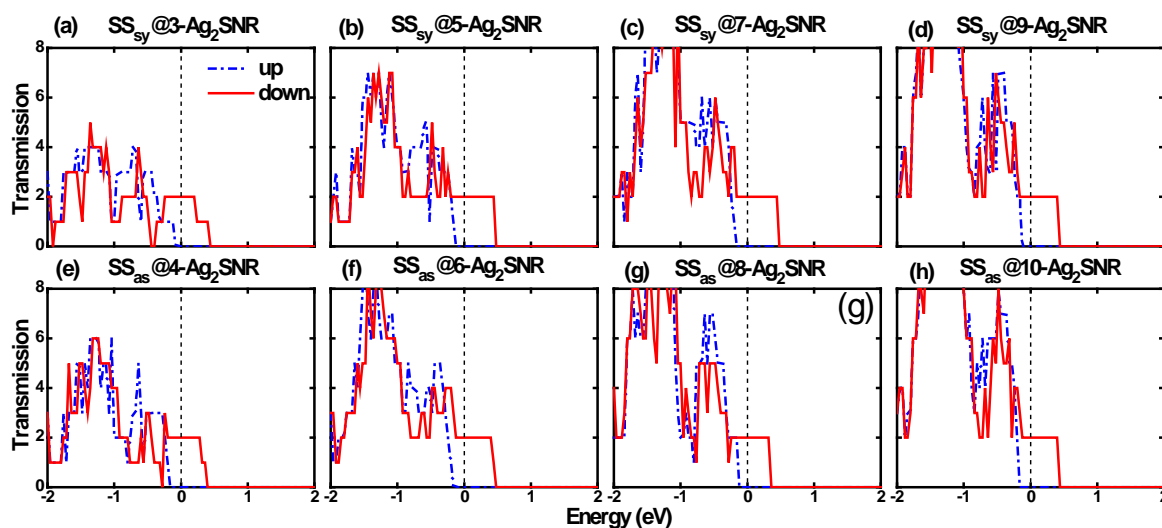

**Fig. S1** (a)-(h) Transmissions of SS<sub>sy</sub>@3-Ag<sub>2</sub>SNR, SS<sub>sy</sub>@5-Ag<sub>2</sub>SNR, SS<sub>sy</sub>@7-Ag<sub>2</sub>SNR, SS<sub>sy</sub>@9-Ag<sub>2</sub>SNR, SS<sub>as</sub>@4-Ag<sub>2</sub>SNR, SS<sub>as</sub>@6-Ag<sub>2</sub>SNR, SS<sub>as</sub>@8-Ag<sub>2</sub>SNR and SS<sub>as</sub>@10-Ag<sub>2</sub>SNR, respectively. The blue dashed dot line denotes the spin up transmission, and red solid line denotes spin down one.

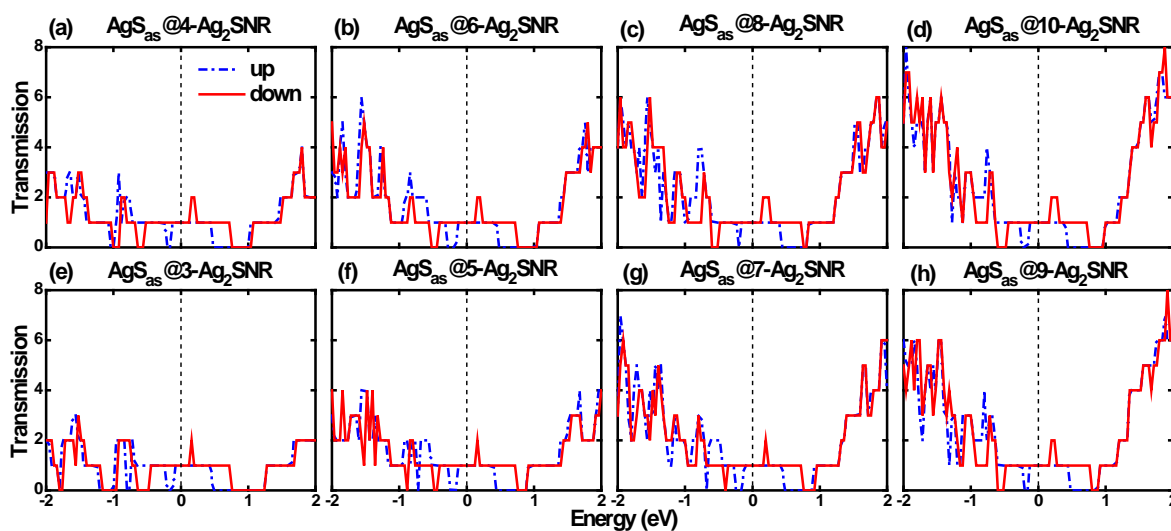

**Fig. S2** (a)-(h) Transmissions of AgS<sub>as</sub>@4-Ag<sub>2</sub>SNR, AgS<sub>as</sub>@6-Ag<sub>2</sub>SNR, AgS<sub>as</sub>@8-Ag<sub>2</sub>SNR, AgS<sub>as</sub>@10-Ag<sub>2</sub>SNR, AgS<sub>sy</sub>@3-Ag<sub>2</sub>SNR, AgS<sub>sy</sub>@5-Ag<sub>2</sub>SNR, AgS<sub>sy</sub>@7-Ag<sub>2</sub>SNR and AgS<sub>sy</sub>@9-Ag<sub>2</sub>SNR, respectively. The blue dashed dot line denotes the spin up transmission, and red solid line denotes spin down one.

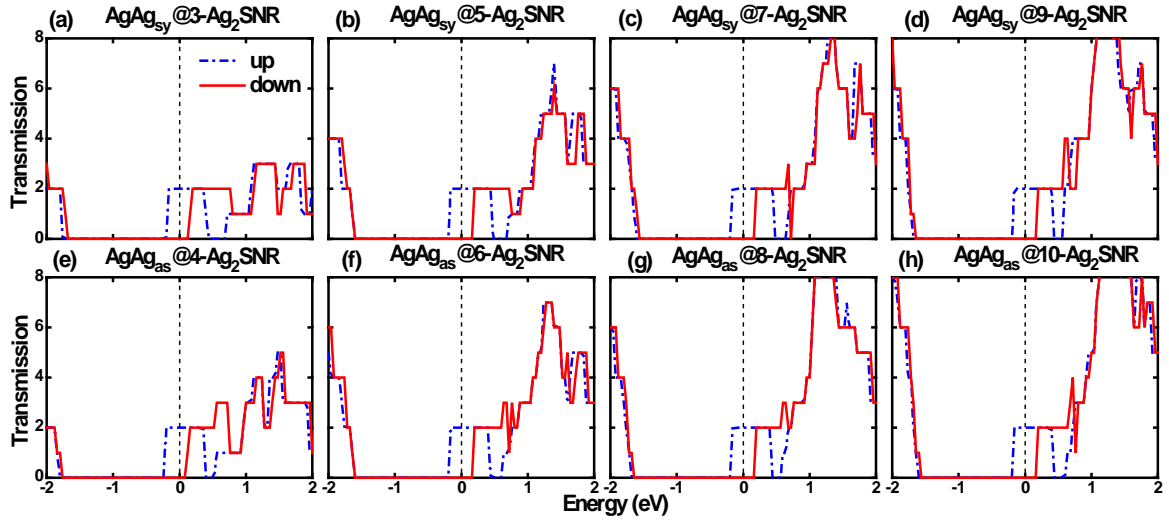

**Fig. S3** (a)-(h) Transmissions of  $\text{AgAg}_{\text{sy}}@3\text{-Ag}_2\text{SNR}$ ,  $\text{AgAg}_{\text{sy}}@5\text{-Ag}_2\text{SNR}$ ,  $\text{AgAg}_{\text{sy}}@7\text{-Ag}_2\text{SNR}$ ,  $\text{AgAg}_{\text{sy}}@9\text{-Ag}_2\text{SNR}$ ,  $\text{AgAg}_{\text{as}}@4\text{-Ag}_2\text{SNR}$ ,  $\text{AgAg}_{\text{as}}@6\text{-Ag}_2\text{SNR}$ ,  $\text{AgAg}_{\text{as}}@8\text{-Ag}_2\text{SNR}$  and  $\text{AgAg}_{\text{as}}@10\text{-Ag}_2\text{SNR}$ , respectively. The blue dashed dot line denotes the spin up transmission, and red solid line denotes spin down one.

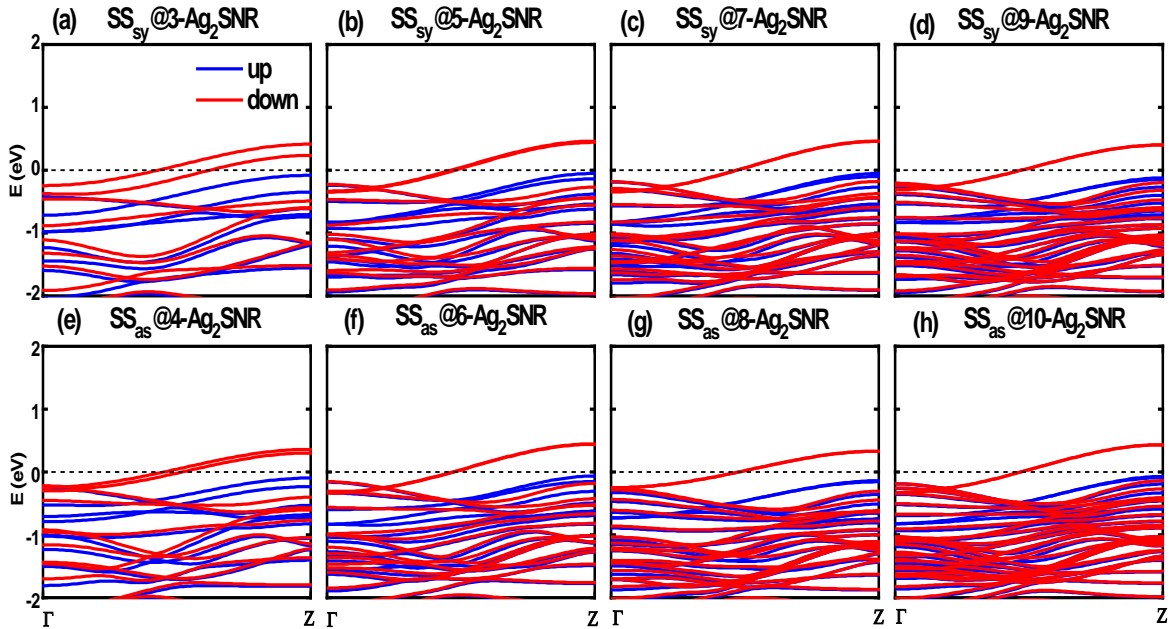

**Fig. S4** (a)-(h) Band structures of  $\text{SS}_{\text{sy}}@3\text{-Ag}_2\text{SNR}$ ,  $\text{SS}_{\text{sy}}@5\text{-Ag}_2\text{SNR}$ ,  $\text{SS}_{\text{sy}}@7\text{-Ag}_2\text{SNR}$ ,  $\text{SS}_{\text{sy}}@9\text{-Ag}_2\text{SNR}$ ,  $\text{SS}_{\text{as}}@4\text{-Ag}_2\text{SNR}$ ,  $\text{SS}_{\text{as}}@6\text{-Ag}_2\text{SNR}$ ,  $\text{SS}_{\text{as}}@8\text{-Ag}_2\text{SNR}$  and  $\text{SS}_{\text{as}}@10\text{-Ag}_2\text{SNR}$ , respectively. The blue solid line denotes the spin up bands, and red solid line denotes spin down one.

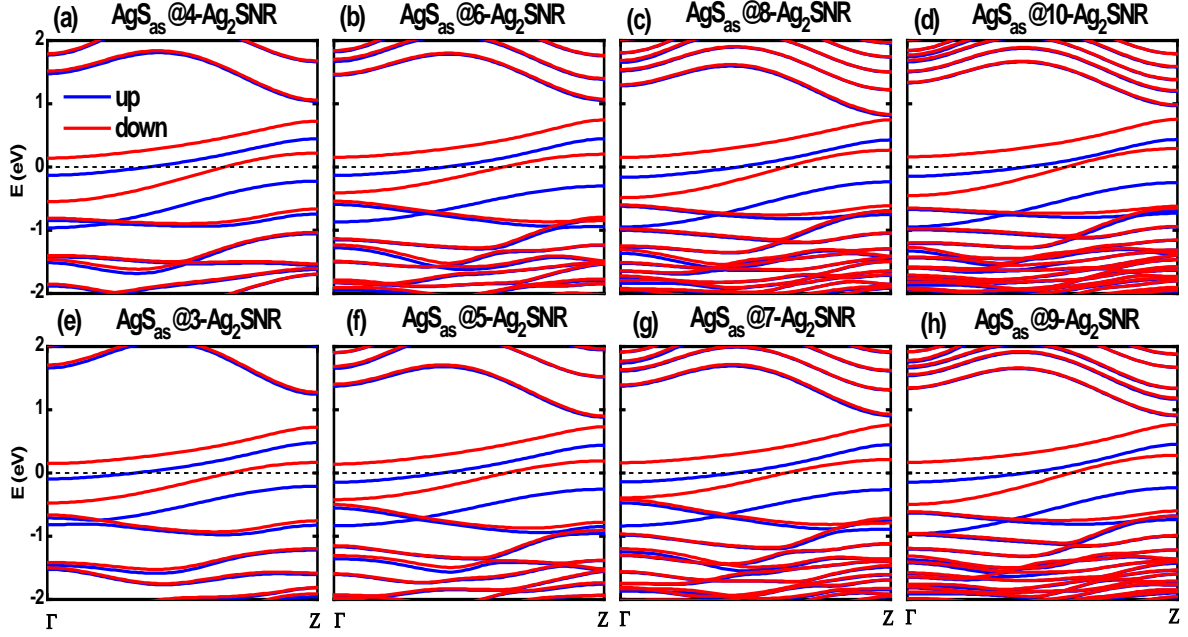

**Fig. S5** (a)-(h) Band structures of  $\text{AgS}_{\text{as}}@4\text{-Ag}_2\text{SNR}$ ,  $\text{AgS}_{\text{as}}@6\text{-Ag}_2\text{SNR}$ ,  $\text{AgS}_{\text{as}}@8\text{-Ag}_2\text{SNR}$ ,  $\text{AgS}_{\text{as}}@10\text{-Ag}_2\text{SNR}$ ,  $\text{AgS}_{\text{sy}}@3\text{-Ag}_2\text{SNR}$ ,  $\text{AgS}_{\text{sy}}@5\text{-Ag}_2\text{SNR}$ ,  $\text{AgS}_{\text{sy}}@7\text{-Ag}_2\text{SNR}$  and  $\text{AgS}_{\text{sy}}@9\text{-Ag}_2\text{SNR}$ , respectively. The blue solid line denotes the spin up bands, and red solid line denotes spin down one.

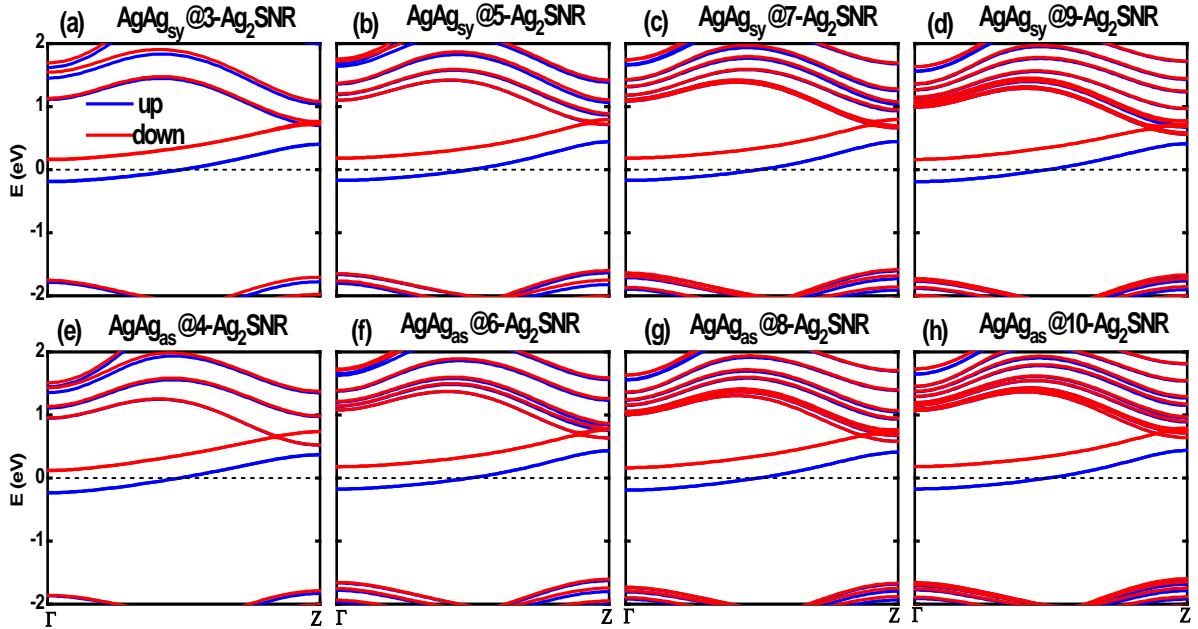

**Fig. S6** (a)-(h) Band structures of  $\text{AgAg}_{\text{sy}}@3\text{-Ag}_2\text{SNR}$ ,  $\text{AgAg}_{\text{sy}}@5\text{-Ag}_2\text{SNR}$ ,  $\text{AgAg}_{\text{sy}}@7\text{-Ag}_2\text{SNR}$ ,  $\text{AgAg}_{\text{sy}}@9\text{-Ag}_2\text{SNR}$ ,  $\text{AgAg}_{\text{as}}@4\text{-Ag}_2\text{SNR}$ ,  $\text{AgAg}_{\text{as}}@6\text{-Ag}_2\text{SNR}$ ,  $\text{AgAg}_{\text{as}}@8\text{-Ag}_2\text{SNR}$  and  $\text{AgAg}_{\text{as}}@10\text{-Ag}_2\text{SNR}$ , respectively. The blue solid line denotes the spin up bands, and red solid line denotes spin down one.

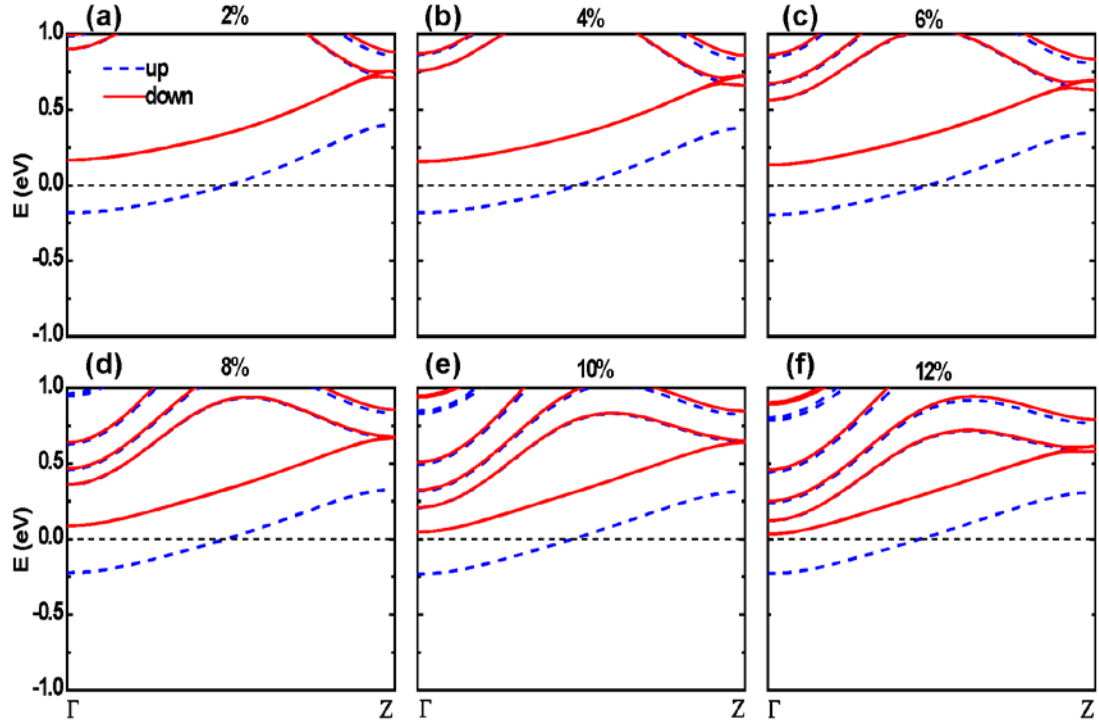

**Fig. S7** (a)-(f) The band structures of  $\text{AgAg}_{\text{sy}}@5\text{-Ag}_2\text{SNR}$  under the applied tensile strains (from 2% to 12%). The blue dashed line denotes the spin up band structure, and the red solid line denotes the spin down one. The Fermi level ( $E_F$ ) is set to 0.

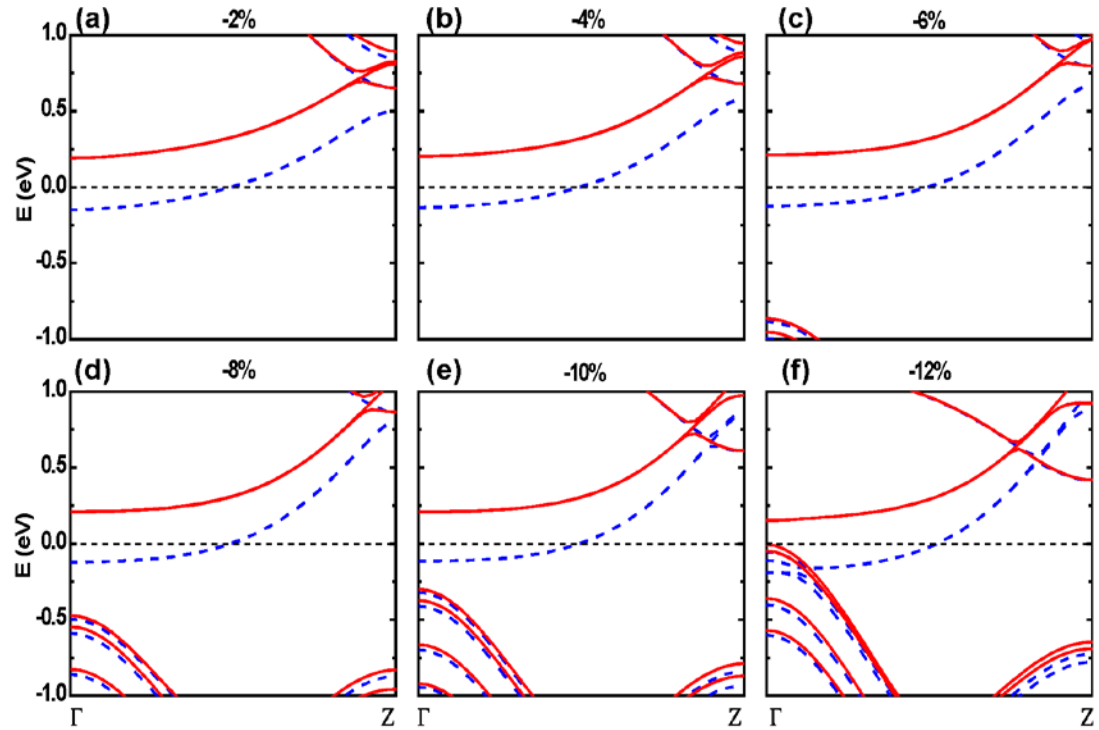

**Fig. S8** (a)-(f) The band structures of  $\text{AgAg}_{\text{sy}}@5\text{-Ag}_2\text{SNR}$  under the applied compressive strains (from -2% to -12%). The blue dashed line denotes the spin up band structure, and the red solid line denotes the spin down one. The Fermi level ( $E_F$ ) is set to 0.

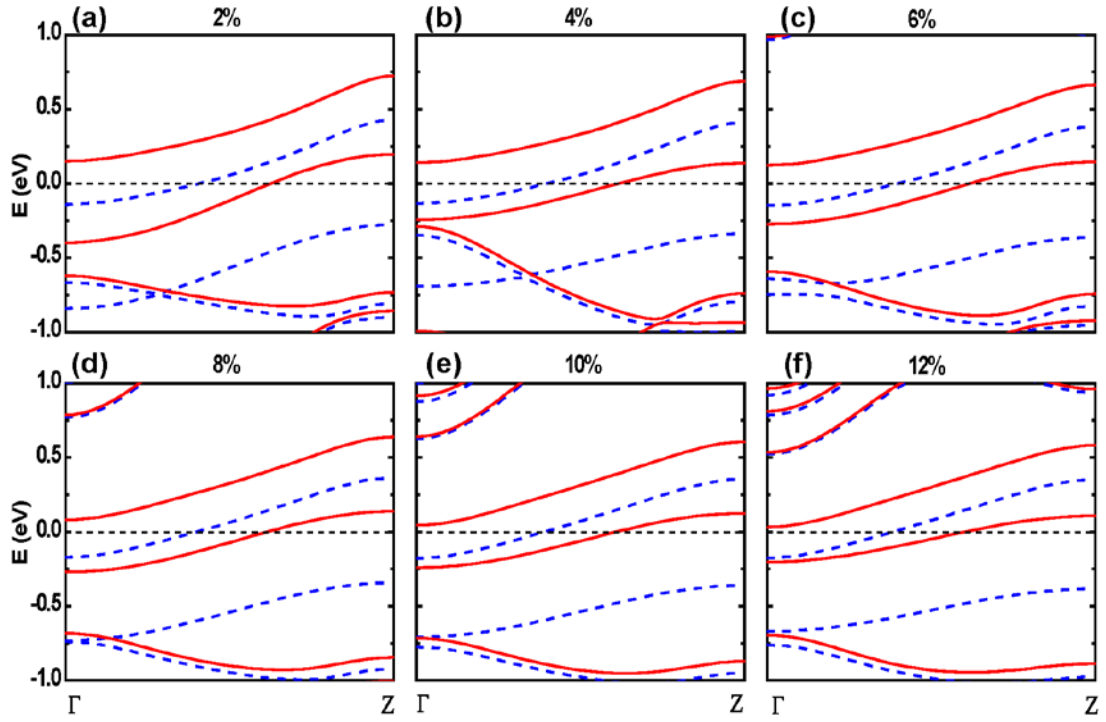

**Fig. S9** (a)-(f) The band structures of  $\text{AgS}_{\text{as}}@6\text{-Ag}_2\text{SNR}$  under the applied tensile strains (from 2% to 12%). The blue dashed line denotes the spin up band structure, and the red solid line denotes the spin down one. The Fermi level ( $E_F$ ) is set to 0.

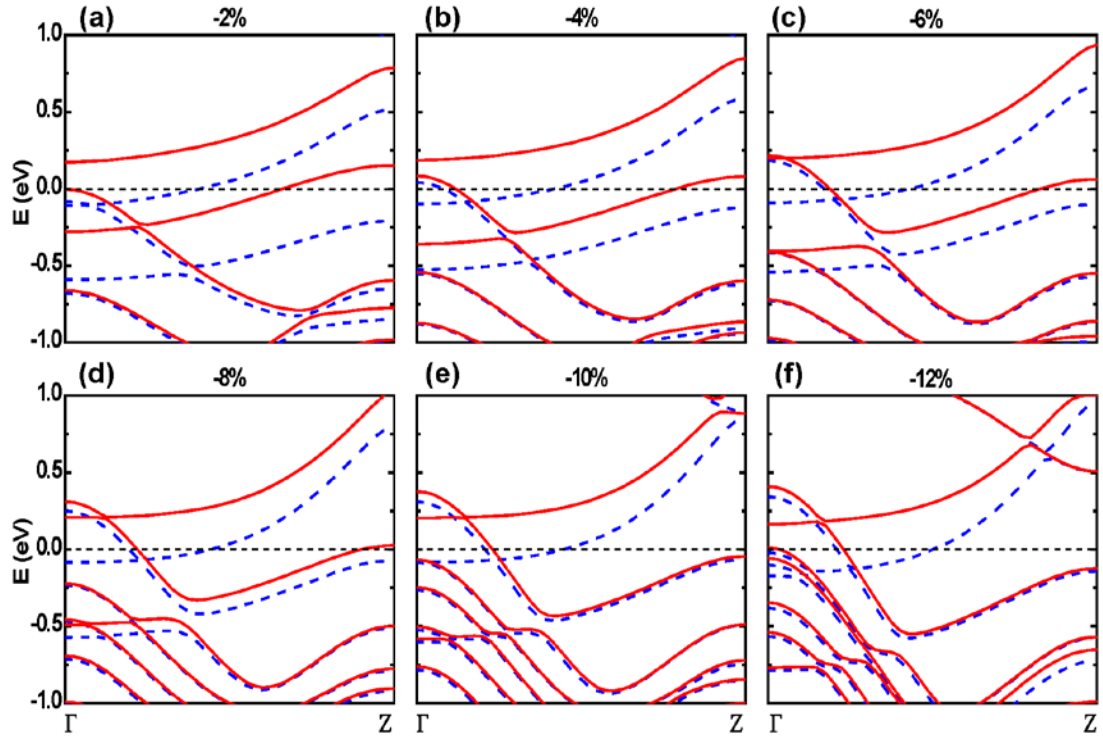

**Fig. S10** (a)-(f) The band structures of  $\text{AgS}_{\text{as}}@6\text{-Ag}_2\text{SNR}$  under the applied compressive strains (from -2% to -12%). The blue dashed line denotes the spin up band structure, and the red solid line denotes the spin down one. The Fermi level ( $E_F$ ) is set to 0.

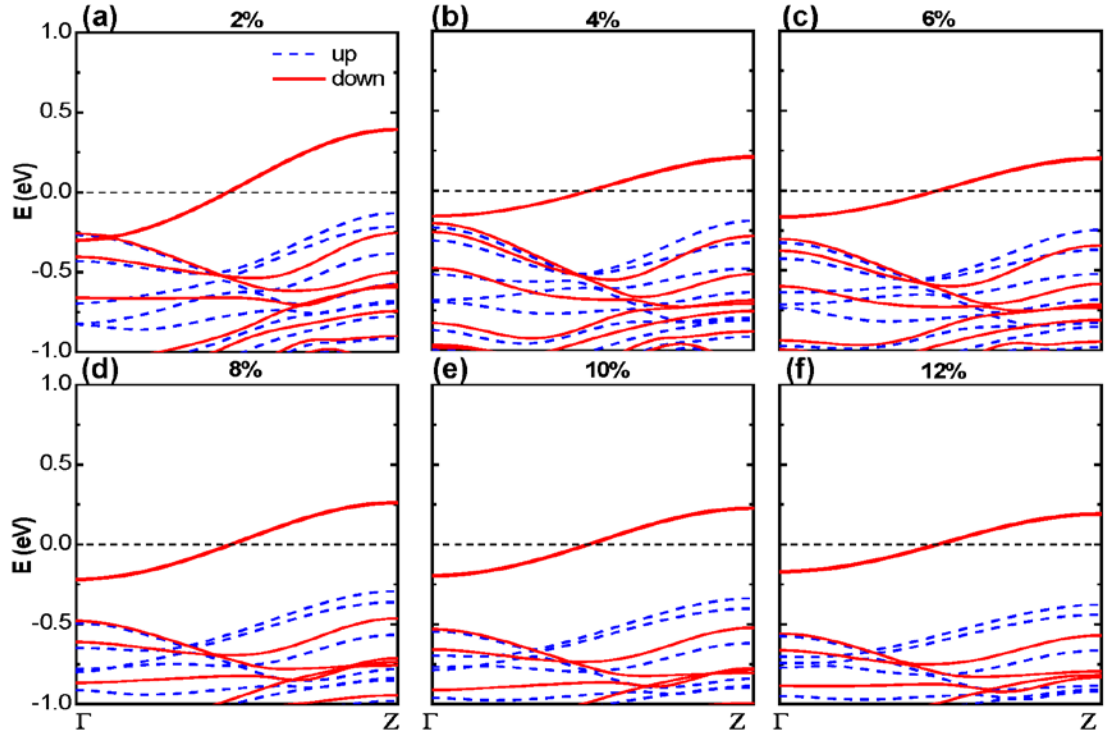

**Fig. S11** (a)-(f) The band structures of  $SS_{as}@6-Ag_2SNR$  under the applied tensile strains (from 2% to 12%). The blue dashed line denotes the spin up band structure, and the red solid line denotes the spin down one. The Fermi level ( $E_F$ ) is set to 0.

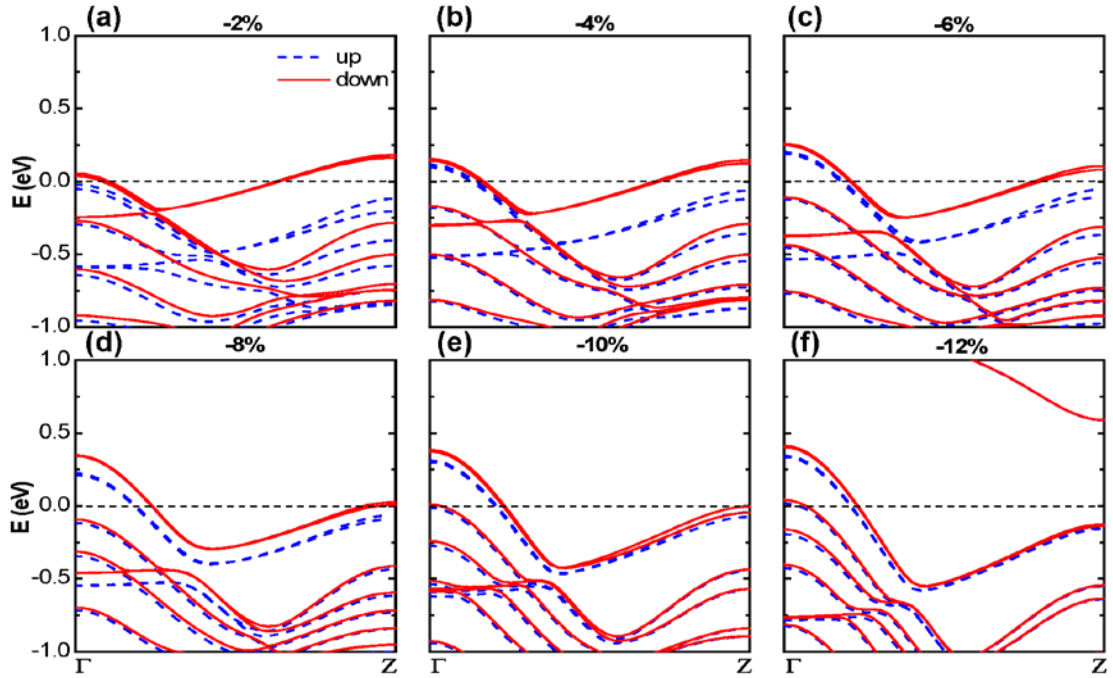

**Fig. S12** (a)-(f) The band structures of  $SS_{as}@6-Ag_2SNR$  under the applied compressible strains (from -2% to -12%). The blue dashed line denotes the spin up band structure, and the red solid line denotes the spin down one. The Fermi level ( $E_F$ ) is set to 0.
